# Supplementary material for: Fast and high-yield synthesis of thiolate Ag44 and Au12Ag32 nanoclusters via the CTAB reverse micelle method
Source: Royal Society of Chemistry journal article supplement (doi:10.1039/d0dt03809a), 2020-12-08
Supplement: d0dt03809a1.pdf [file d0dt03809a1.pdf]

## Supplementary Information

### **Fast and efficient synthesis of thiolate Ag<sub>44</sub> and Au<sub>12</sub>Ag<sub>32</sub> nanoclusters via CTAB reverse micelles**

Lubing Qin,<sup>a</sup> Feng Zhang,<sup>c</sup> Xiaoshuang Ma,<sup>a</sup> Yun Tang,<sup>a</sup> Guanyu Ma,<sup>a</sup> and Zhenghua Tang<sup>\*,a,b</sup>

<sup>a</sup> Guangzhou Key Laboratory for Surface Chemistry of Energy Materials and New Energy Research Institute, School of Environment and Energy, South China University of Technology, Guangzhou Higher Education Mega Center, Guangzhou, 510006, China

Email: zhht@scut.edu.cn

<sup>b</sup> Guangdong Engineering and Technology Research Center for Surface Chemistry of Energy Materials, School of Environment and Energy, South China University of Technology, Guangzhou Higher Education Mega Centre, Guangzhou, 510006, China

<sup>c</sup> Petrochina Yunnan Petrochemical Company Limited, Kunming, 650000, China

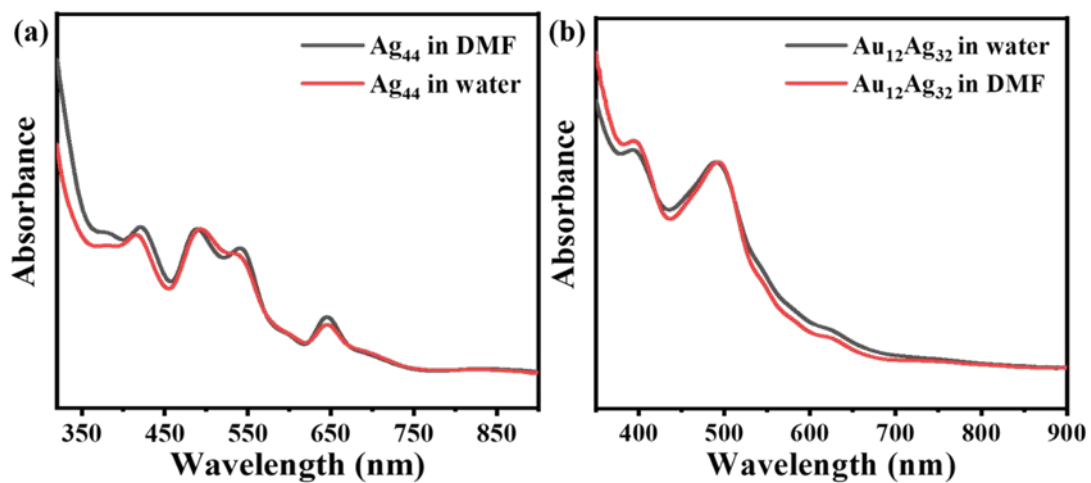

**Figure S1** (a) UV-vis absorbance spectra of the as-synthesized  $\text{Ag}_{44}$  NCs in water and DMF, (b) UV-vis absorbance spectra of the as-synthesized  $\text{Au}_{12}\text{Ag}_{32}$  NCs in DMF and water.

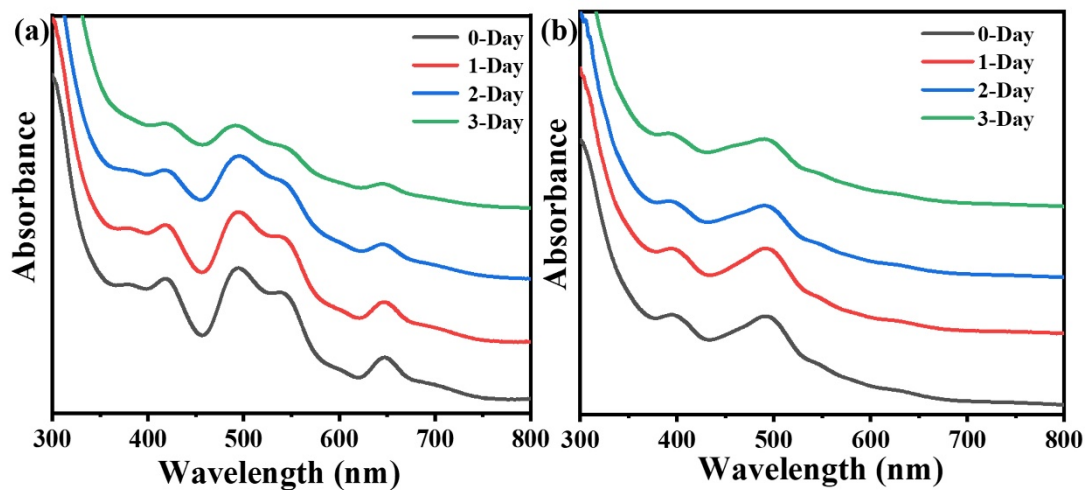

**Figure S2** UV-vis absorbance spectra of the reaction solutions of (a)  $\text{Ag}_{44}(\text{p-MBA})_{30}$  and (b)  $\text{Au}_{12}\text{Ag}_{32}(\text{p-MBA})_{30}$  at room temperature in toluene with the change of time.

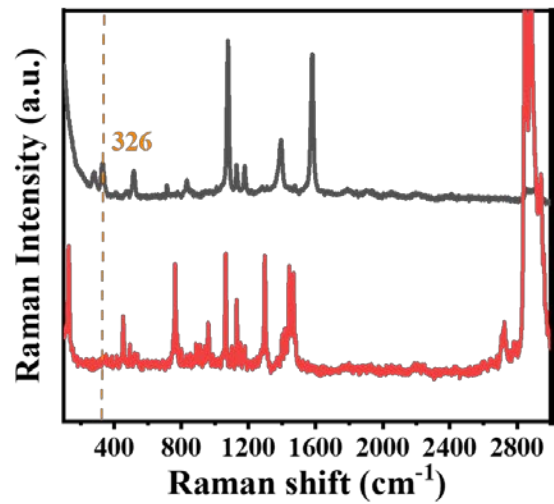

**Figure S3** Raman spectra of the toluene phase (black line) and the aqueous phase (red line) when synthesizing Au<sub>12</sub>Ag<sub>32</sub> NCs.

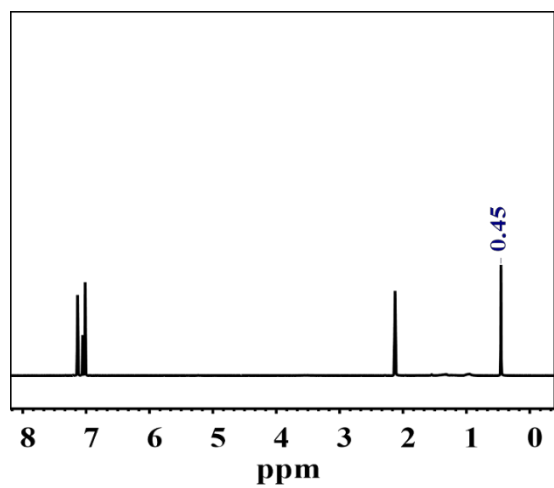

**Figure S4** <sup>1</sup>H NMR spectrum of free water in toluene-d<sub>8</sub>.

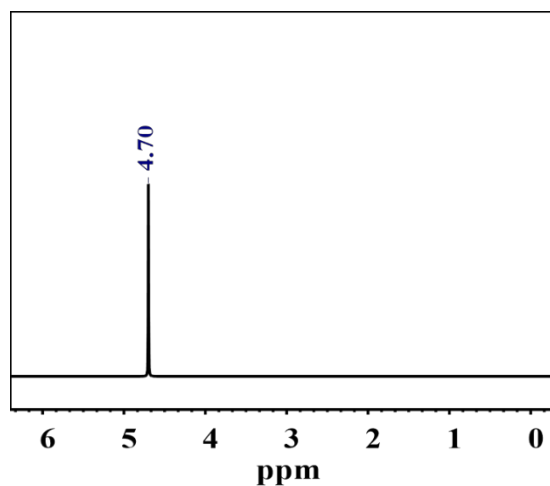

Figure S5 <sup>1</sup>H NMR spectrum of ordinary water in D<sub>2</sub>O.

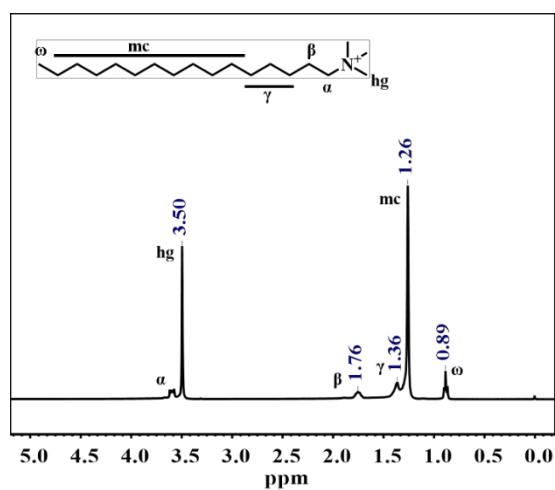

Figure S6 <sup>1</sup>H NMR spectrum of pure CTAB in CDCl<sub>3</sub>.

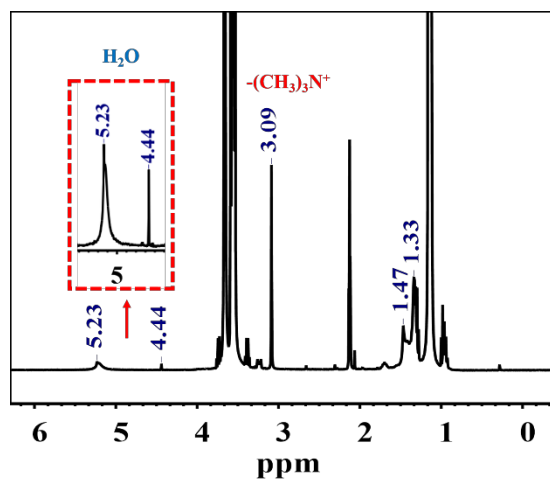

Figure S7 <sup>1</sup>H NMR spectrum of toluene-d<sub>8</sub> phase before adding the reductant during the synthesis of Ag<sub>44</sub> NCs.

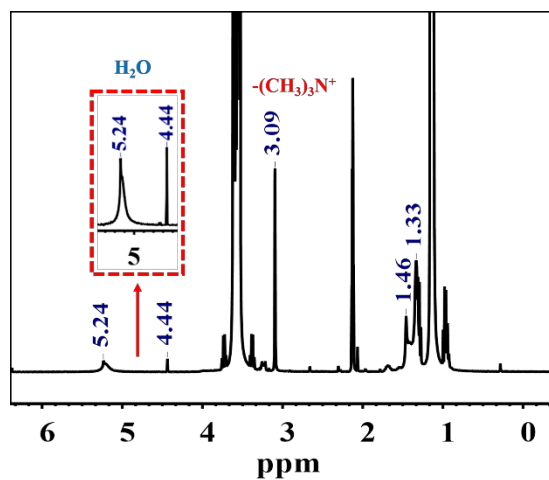

**Figure S8**  $^1\text{H}$  NMR spectrum of toluene- $d_3$  phase after adding reductant 30 min in the synthesis of  $\text{Ag}_{44}$  NCs.

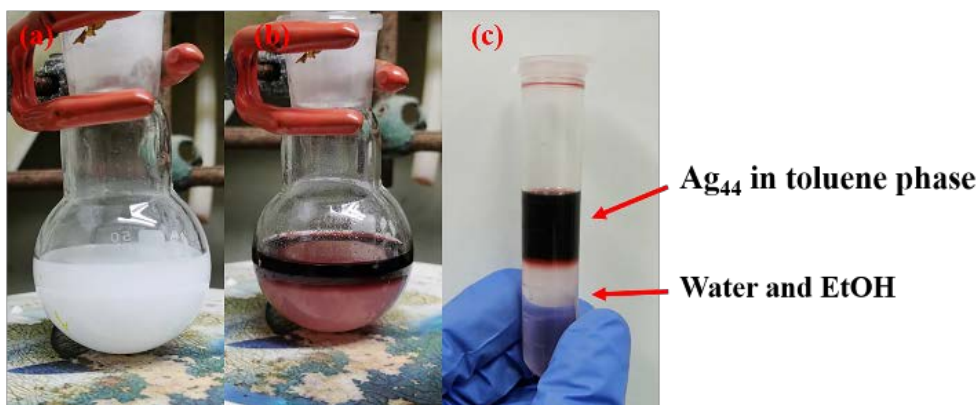

**Figure S9.** The photograph before adding the reducing agent (a) after adding reductant for 15 mins (b) after standing (c) in the process of  $\text{Ag}_{44}$  NCs synthesis by reverse micelle method.
